# Supplementary material for: Alumina-mediated mechanochemical method for simultaneously degrading perfluorooctanoic acid and synthesizing a polyfluoroalkene
Source: Royal Society of Chemistry journal article supplement (doi:10.1039/c8gc00854j), 2018-01-01
Supplement: c8gc00854j1.pdf [file c8gc00854j1.pdf]

## Electronic Supplementary Information for

### Alumina-mediated mechanochemical method for simultaneously degrading perfluorooctanoic acid and synthesizing a polyfluoroalkene†

Hanqing Lv<sup>†,a</sup>, Nan Wang<sup>†,a</sup>, Lihua Zhu<sup>\*,a</sup>, Yuqi Zhou<sup>a</sup>, Wenjing Li<sup>b</sup>, and Heqing Tang<sup>\*,b</sup>

<sup>a</sup> College of Chemistry and Chemical Engineering, Huazhong University of Science & Technology, Wuhan, 430074, P.R. China.

<sup>b</sup> College of Resources and Environmental, South-Central University for Nationalities, Wuhan, 430074, P.R. China.

E-mail: lh Zhu63@hust.edu.cn; tangheqing@mail.scuec.edu.cn

#### Table of Contents

|                                                                                 |   |
|---------------------------------------------------------------------------------|---|
| Table of Contents.....                                                          | 1 |
| Experimental.....                                                               | 2 |
| Isolation of 1H-1-PFHp as the major product .....                               | 2 |
| Quantification of organic products .....                                        | 2 |
| Results and discussion .....                                                    | 3 |
| Method validation of the GC-FID quantification of organic products .....        | 3 |
| Defluorination of different substrates by MC process and thermal treatment..... | 4 |
| Identification and quantification of organic products .....                     | 5 |
| Possibilities of scale-up on the MC conversion of PFOA into 1H-1-PFHp .....     | 6 |
| DR-FTIR spectra of Al-F bonds.....                                              | 7 |
| DR-FTIR spectra of thermal treatment of Alumina .....                           | 8 |
| References .....                                                                | 8 |

## Experimental

### Isolation of 1H-1-PFHp as the major product

To isolate the major product 1H-1-PFHp, the MC conversion experiment of PFOA was conducted with an increased scale by several independent runs. In each run, 1.18 g PFOA was treated with 7.22 g alumina at a ball-to-powders weight ratio of 50. The reaction was ended at 3 h of ball milling. After the reaction was ended, 20 mL diethyl ether was slowly injected into the milling pot, and the extracted dispersion was cleaned by a filtration treatment. Then, the collected clean solution was transferred into a 25 mL round-bottomed flask, and the flask was placed on a water bath under the magnetic stirring. The water bath was slowly heated to 45 °C, and the vapor temperature was controlled at  $(34.5 \pm 0.5)$  °C, which was very close to the boil point of diethyl ether. The diethyl ether was recovered in the distillate fraction on a Vigreux column (30 × 1.5 cm), and the organic product was collected in the residual fraction (RF). The distillation process was stopped when the vapor temperature started cooling down. Finally, the isolation yield was calculated from the mass of the product. In addition, the components in both distillates and residual fraction were analysed to access the purity of 1H-1-PFHp. Prior to GC-FID analysis, both DF and RF were diluted with acetone by 100 times. The relative distribution of 1H-1-PFHp to diethyl ether was achieved based on the relative correction factors ( $f_m$ ).

The applicability of the isolation method was accessed by using nano fluoro-1-hexene (PFBE) as a reference compound. When a 6 mL mixture of PFBE and diethyl ether (1:5, V/V; 1.4:3.6, m/m) was subjected to an atmospheric distillation (35 °C), it was obtained 1.30 g residual fraction containing PFBE (purity, 92%) and 3.28 g distillate containing diethyl ether (purity, 97%). This indicated the above isolation steps can be applied to simultaneously separate 1H-1-PFHp and recover the solvents.

### Quantification of organic products

The quantification of 1H-1-PFHp was analyzed by GC measurements with fluorobenzene as the internal standard. GC analyses were conducted on a gas chromatography-flame ionization detector system (GC-FID, 7890B, Agilent, USA) equipped with an Rtx-502.2 column (60 m × 0.32 mm × 1.8 μm, Restek, USA). The injector and FID temperatures were set at 200 and 260 °C, respectively. The oven temperature program started at 25 °C for 2 min and was increased at 10 °C/min up to 180 °C and maintained at 180 °C for 5 min.

Because pure authentic standards of the products were not commercially available, quantification of the products was achieved by comparing their response signals to those of an internal standard (fluorobenzene, FB) with simulated relative correction factors ( $f_{m,pre}$ ). The amount of each product was calculated by the following equation (eq. S1),

$$m_{\text{product}} = \frac{f_{m,pre} \times m_{\text{FB}} \times A_{\text{product}}}{\alpha \times A_{\text{FB}}} \quad \text{S1}$$

where  $m_{\text{product}}$  and  $m_{\text{FB}}$  are the masses of the substances,  $A_{\text{product}}$  and  $A_{\text{FB}}$  are the integrals of the FID responses of the substances, and  $\alpha$  is the correction constant of the real  $f_m$  toward the predicted  $f_{m,pre}$ , respectively.

The  $f_{m,pre}$  value of each product relative to fluorobenzene was calculated by the following equation (eq. S2) as reported by Chaintreau et al.<sup>1,2</sup>

$$f_{m,pre} = \frac{M_{\text{product}}(-61.5 + 88.8n_{\text{C(FB)}} + 18.7n_{\text{H(FB)}} - 20.2n_{\text{F(FB)}} + 127n_{\text{benz(FB)}})}{M_{\text{FB}}(-61.5 + 88.8n_{\text{C(product)}} + 18.7n_{\text{H(product)}} - 20.2n_{\text{F(product)}})} \quad \text{S2}$$

where  $n_{\text{C}}$ ,  $n_{\text{H}}$ ,  $n_{\text{F}}$  and  $n_{\text{benz}}$  are the number of carbon, hydrogen, fluorine and benzene rings, respectively and  $M_{\text{product}}$  and  $M_{\text{FB}}$  are the molecular weights of the substances.

To verify the simulated  $f_{m,pre}$ , the homologous compounds PFBE and PFO, which have similar perfluorinated carbon chains, were chosen as the model substances. We compared the relative correction factors of PFBE (or PFO) to FB, toluene (TOL) and *n*-hexane (Hex) as internal standards between the simulated value and measured values.

The standard solutions of both analytes (PFBE and PFO) and internal standards (FB, TOL and Hex) were made by accurately weighing approximately 0.0500 g of the compound into a 10-mL volumetric flask, and then diluting the sample with acetone to volume. A series of solutions were prepared by dissolving various volumes of PFBE (or PFO) and certain volumes of FB, TOL and Hex standard solutions, and the total volume of each solution was fixed at 1.5 mL. Then, the mixtures of PFBE (or PFO) with the three internal standards were analyzed using GC-FID under the abovementioned conditions. For example, the experimental  $f_{m,exp}$  values of PFBE to FB were calculated by the following equation (eq. S3):

$$f_{m,exp} = \frac{m_{\text{PFBE}} \times A_{\text{FB}}}{m_{\text{FB}} \times A_{\text{PFBE}}} \quad \text{S3}$$

where  $m_{\text{PFBE}}$  and  $m_{\text{FB}}$  are the masses of the substances and  $A_{\text{PFBE}}$  and  $A_{\text{FB}}$  are the integrals of the FID responses of the substances, respectively.

## Results and discussion

### Method validation of the GC-FID quantification of organic products

For a mixture of PFBE, FB, TOL and Hex, there were differences of less than 10% between the predicted  $f_m$  and the measured  $f_{m,exp}$  values; the exception to this was the predicted  $f_{m,pre}$  of PFBE to the other three internal standards (Table S1). The  $f_{m,pre}$  value of PFBE was approximately 1.65 times more than the corresponding measured  $f_{m,exp}$  value. This indicated that  $f_{m,exp}$  values of the perfluorinated derivatives had deviated from their predicted  $f_{m,pre}$  values. A shift in the  $f_{m,exp}$  of the perfluorinated derivatives was also observed for a mixture of PFO, FB, TOL and Hex (Table S2). Interestingly, the predicted  $f_{m,pre}$  of PFO to the other three internal standards was also 1.65 times more than the measured  $f_{m,exp}$ . Thus, the real  $f_m$  for the perfluorinated derivatives can be correlated from the predicted  $f_{m,pre}$  by the following equation (eq. S4):

$$f_m = \frac{f_{m,pre}}{1.65} \quad S4$$

That is, by combining a correlation factor of 1.65, the predicted  $f_{m,pre}$  value can be used to quantify the amount of polyfluoroalkenes. To evaluate the accuracy of the estimation method by using the predicted  $f_{m,pre}$  value, we investigated the quantification of PFBE by using fluorobenzene as the internal standard. A series of samples were prepared by dissolving various amounts of PFBE and certain amounts of fluorobenzene in acetone, and then analyzing those samples with GC-FID under the abovementioned conditions. Based on Eq. S3, the  $f_{m,pre}$  of PFBE was calculated to be 4.98. By using Eq. S5, the mass of PFBE could be calculated, and the results are shown in Table S3. Recoveries ranged from 93.9% to 108.4% with relative standard deviations of less than 5%. These results indicated that the analysis method was high reproducible and confirmed the method performed acceptably. Thus, the method can be used to quantify the polyfluoroalkene content by using the predicted  $f_{m,pre}$  (eq. S3) and a correlation factor of 1.65.

Similarly, the  $f_m$  of 1H-PFHp to diethyl ether was calculated to be 3.6, which was employed to access the relative distribution of components in both distillates and residual fraction.

Table S1. Analysis of PFBE using FB, MB and Hex as internal standards and the compiled relative response factors

|          | $f_{m,exp}$ | $f_{m,pre}$ | $f_{m,pre}/f_{m,exp}$ |
|----------|-------------|-------------|-----------------------|
| PFBE/FB  | 2.96        | 4.98        | 1.68                  |
|          | 3.04        |             | 1.64                  |
| PFBE/TOL | 3.72        | 6.47        | 1.74                  |
|          | 3.65        |             | 1.77                  |
| PFBE/Hex | 3.62        | 6.06        | 1.67                  |
|          | 3.69        |             | 1.64                  |
| Hex/TOL  | 0.97        | 1.07        | 1.10                  |
|          | 1.03        |             | 1.04                  |
| Hex/FB   | 0.86        | 0.82        | 0.95                  |
|          | 0.94        |             | 0.88                  |
| FB/TOL   | 1.20        | 1.30        | 1.08                  |
|          | 1.13        |             | 1.12                  |

Table S2. Analysis of PFO using FB, MB and Hex as internal standards and the compiled relative response factors

|         | $f_{m,exp}$ | $f_{m,pre}$ | $f_{m,pre}/f_{m,exp}$ |
|---------|-------------|-------------|-----------------------|
| PFO/FB  | 6.36        | 10.73       | 1.69                  |
|         | 6.97        |             | 1.54                  |
| PFO/TOL | 9.10        | 13.94       | 1.53                  |
|         | 8.86        |             | 1.57                  |
| PFO/Hex | 7.77        | 13.06       | 1.68                  |
|         | 7.96        |             | 1.64                  |
| Hex/TOL | 1.18        | 1.07        | 0.91                  |
|         | 1.13        |             | 0.99                  |
| Hex/FB  | 1.09        | 0.82        | 0.85                  |
|         | 0.75        |             | 0.82                  |
| FB/TOL  | 1.26        | 1.30        | 1.03                  |
|         | 1.56        |             | 0.83                  |

**Table S3.** Analysis of PFBE using FB as an internal standard and the determination results

| Sample                | $m_{\text{PFBE,add}}$<br>/ $\mu\text{g}$ | $A_{\text{PFBE}}$ / a.u. | $m_{\text{FB}}$<br>/ $\mu\text{g}$ | $A_{\text{FB}}$ / a.u. | $m_{\text{PFBE,det}}$<br>/ $\mu\text{g}$ | Recovery<br>/% |
|-----------------------|------------------------------------------|--------------------------|------------------------------------|------------------------|------------------------------------------|----------------|
| 1                     | 1587                                     | 62530.2                  | 8678.5                             | 1022514.6              | 1602.8                                   | 101.0          |
|                       |                                          | 60413.5                  |                                    | 951446.6               | 1664.2                                   | 104.9          |
|                       |                                          | 58689.6                  |                                    | 904814.9               | 1700.0                                   | 107.1          |
|                       |                                          | 120929.3                 |                                    | 854749.4               | 3053.7                                   | 96.2           |
| 2                     | 3174                                     | 121244.6                 | 7147                               | 854934.3               | 3061.0                                   | 96.4           |
|                       |                                          | 119607.8                 |                                    | 823469.7               | 3135.0                                   | 98.8           |
|                       |                                          | 176289.1                 |                                    | 531977.4               | 5109.0                                   | 96.6           |
|                       |                                          | 194415.4                 |                                    | 589461.7               | 5084.9                                   | 96.1           |
| 3                     | 5290                                     | 189683.5                 | 5105                               | 559454.2               | 5227.2                                   | 98.8           |
|                       |                                          | 208731.6                 |                                    | 376967.8               | 6829.3                                   | 107.6          |
|                       |                                          | 214852.5                 |                                    | 385200.7               | 6879.3                                   | 108.4          |
|                       |                                          | 220607.4                 |                                    | 427328.5               | 6367.2                                   | 100.3          |
| 4                     | 6348                                     | 54237.4                  | 4084                               | 1014223.4              | 1501.8                                   | 101.0          |
|                       |                                          | 45366.9                  |                                    | 920118.8               | 1384.6                                   | 98.7           |
|                       |                                          | 52801.6                  |                                    | 992104.5               | 1494.6                                   | 91.0           |
|                       |                                          | 124252.9                 |                                    | 939391                 | 3059.0                                   | 98.3           |
| 5                     | 1521                                     | 131479.2                 | 9299                               | 946070.8               | 3214.1                                   | 100.6          |
|                       |                                          | 117559.9                 |                                    | 913167.4               | 2977.4                                   | 105.7          |
|                       |                                          | 206299.1                 |                                    | 675014.6               | 5048.7                                   | 97.9           |
|                       |                                          | 208853.1                 |                                    | 675014.6               | 5111.2                                   | 99.6           |
| 6                     | 3042                                     | 185576.4                 | 7658                               | 616177.9               | 4975.2                                   | 100.8          |
|                       |                                          | 231294.4                 |                                    | 513607.1               | 5951.4                                   | 98.1           |
|                       |                                          | 223195.4                 |                                    | 482101.2               | 6118.3                                   | 97.8           |
|                       |                                          | 249277                   |                                    | 544512.2               | 6050.1                                   | 100.6          |
| 7                     | 5070                                     | 305606.4                 | 4376                               | 247006.4               | 8175.4                                   | 99.4           |
|                       |                                          | 323848.1                 |                                    | 260554.4               | 8212.9                                   | 100.8          |
|                       |                                          | 345943.4                 |                                    | 281285.7               | 8126.7                                   | 101.2          |
|                       |                                          | 230437.1                 |                                    | 178802.3               | 7947.7                                   | 93.9           |
| 8                     | 6084                                     | 300477                   | 2188                               | 225166.1               | 8229.5                                   | 97.2           |
|                       |                                          | 236946                   |                                    | 181338.4               | 8057.9                                   | 95.2           |
|                       |                                          |                          |                                    |                        |                                          | 99.6           |
|                       |                                          |                          |                                    |                        |                                          | 4.0            |
| Average recovery /%   |                                          |                          |                                    |                        |                                          | 99.6           |
| Relative deviation /% |                                          |                          |                                    |                        |                                          | 4.0            |

### Defluorination of different substrates by MC process and thermal treatment

Table S4 compared the degradation and defluorination of different fluorinated compounds. In the MC/ $\text{Al}_2\text{O}_3$  system, the 2-h MC treatment resulted in a high degradation removal (95.9%) of PFOA and a low defluorination efficiency (14.1%). According to eq. S1, the selectivity of the generated  $\text{F}^-$  ions was calculated and it seemed to be unchanged ( $13.1 \pm 3.2\%$ ). When the MC/ $\text{Al}_2\text{O}_3$  system was used to treat the shorter chain perfluorinated carboxylic acids, all the added substrates were degraded after 2-h MC treatment, but it also gave a low defluorination efficiency and selectivity ( $< 25\%$ ). This indicated a controlled partial defluorination of perfluorinated carboxylic acids in the MC/ $\text{Al}_2\text{O}_3$  system. Perfluorooctane, which has the same C–F framework but lacks the carboxyl group, was subjected to the MC/ $\text{Al}_2\text{O}_3$  treatment. Both the conversion and defluorination of perfluorooctane were negligible in the MC/alumina system. Thus, the acid-base reaction between the COOH group of perfluoro acids and the surface OH groups on the alumina is necessary to strongly anchor the perfluoro acids during their MC defluorination reaction.

As is well known, unlike alumina,  $\text{SiO}_2$  has an abundance of surface OH groups available but no Lewis acid sites. The defluorination of PFOA was significantly suppressed in MC/ $\text{SiO}_2$  system and 2 h of milling only reached 2.9% defluorination and a  $\text{F}^-$  selectivity of 6.6%. These differences suggested that the Lewis acid sites on the alumina played a critical role in the breakage of the C–F bonds.

In addition, a 30-min heat treatment at  $150^\circ\text{C}$  decomposed only 21.9% of the PFOA and showed a very low defluorination rate (1.1%). This implies that a simple combination of alumina and thermal treatment was not efficient in breaking the C–F bonds.

**Table S4.** Conversion and defluorination of different substrates after a MC conversion and thermal treatment.

| Substrate                            | System                      | Time<br>(h) | Conv.<br>(%) | $\text{F}^-$ ions<br>Y (%) | S (%) |
|--------------------------------------|-----------------------------|-------------|--------------|----------------------------|-------|
| PFOA                                 | MC/ $\text{Al}_2\text{O}_3$ | 0.5         | 39.7         | 5.1                        | 12.7  |
|                                      |                             | 1           | 60.8         | 8.6                        | 14.1  |
|                                      |                             | 2           | 95.9         | 14.1                       | 14.7  |
|                                      | MC/ $\text{SiO}_2$          | 0.5         | 16.8         | 2.9                        | 17.3  |
|                                      |                             | 2           | 42.2         | 2.8                        | 6.6   |
|                                      |                             | 1           | 98.1         | 15.0                       | 15.3  |
| $\text{C}_6\text{F}_{13}\text{COOH}$ | MC/ $\text{Al}_2\text{O}_3$ | 2           | 100          | 16.1                       | 16.1  |
|                                      |                             | 1           | 99.1         | 22.7                       | 22.9  |
| $\text{C}_4\text{F}_9\text{COOH}$    | MC/ $\text{Al}_2\text{O}_3$ | 2           | 100          | 23.2                       | 23.2  |
|                                      |                             | 0.5         | 2.2          | 2.9                        | /     |
| $\text{C}_8\text{F}_{18}$            | MC/ $\text{Al}_2\text{O}_3$ | 2           | 2.8          | 2.7                        | /     |
|                                      |                             | 0.5         | 21.9         | 1.1                        | 5     |

## Identification and quantification of organic products

The FT-IR spectrum of the products is presented in Figure 1b in the main text. The peaks at 1100~1300  $\text{cm}^{-1}$  were assigned to the characteristic absorptions of C–F stretch, and the characteristic bands of C=C and aliphatic C–H stretches were clearly observed at 1676  $\text{cm}^{-1}$  and 3011  $\text{cm}^{-1}$ , respectively.<sup>3</sup> These bands confirmed that the organic product was a fluorinated aliphatic olefin.

GC-MS and FT-MS were used to further identify the organic product. Figure 1c shows the total ion current (TIC) profile and MS data of the product. The TIC profile indicated that there were two products, but the major product had a retention time of 5.80 min. According to the MS data, the major product showed fragments similar to those of the precursor with  $m/z$ = 69.36 ( $\text{CF}_3$ ), 118.97 ( $\text{CF}_3\text{CF}_2$ ), 169.18 ( $\text{CF}_3\text{CF}_2\text{CF}_2$ ), 218.79 ( $\text{CF}_3(\text{CF}_2)_2\text{CF}_2$ ), 231.06 ( $\text{CF}_3(\text{CF}_2)_3\text{C}$ ) and 281.06 ( $\text{CF}_3(\text{CF}_2)_4\text{C}$ ). From the FT-MS analysis (Figure S1a), the component with  $m/z$ =330.93884 in the negative ion mode could be assigned to the  $\text{CF}_3(\text{CF}_2)_4\text{CF}^-$  fragment (theoretical  $m/z$ , 330.97924). Taken together with the FTIR result, the major organic product may be identified as 1H-perfluorohept-1-ene ( $\text{CF}_3(\text{CF}_2)_4\text{CF}=\text{CFH}$ ).

The molecular structure of the major organic product was further clarified by  $^{19}\text{F}$  and  $^{13}\text{C}$  NMR spectroscopy. Figure 1d shows the  $^{19}\text{F}$  NMR spectrum of the PFOA solution and the spectrum of the extracted organic products generated by PFOA milling with  $\text{Al}_2\text{O}_3$  for 2 h. For the PFOA solution, the resonance at –82.9 ppm was assigned to the terminal  $\text{C}(1)\text{F}_3$ ; the resonances for the  $\text{CF}_2$  units in the backbone ( $\text{C}(3-5)\text{F}_2$ ) were in the –122.1 to –123.5 ppm range; the peak at a lower frequency (–126.7 ppm) and the peak at a higher frequency (–119.4 ppm) that that of the main  $\text{CF}_2$  peak were attributed to the  $\text{CF}_2$  group adjacent to the terminal  $\text{CF}_3$  and the  $\text{CF}_2$  group next to the carboxylic acid group ( $\text{C}(7)\text{F}_2$  and  $\text{C}(2)\text{F}_2$ ), respectively.<sup>4</sup> After the 2.5-h MC treatment (i.e., in the case of the extracted organic product), the resonance of the  $\text{CF}_2$  group adjacent to the  $\text{COOH}$  group and one of the backbone  $\text{CF}_2$  units at –119.4 and –122.1 ppm had disappeared. Instead, two new peaks at –129.9 and –139.2 ppm were observed, which were attributed to the  $=\text{CF}-$  and  $=\text{CFH}$  units, respectively.<sup>5</sup> From the  $^{13}\text{C}$  NMR spectrum of the organic product (Figure S1b), five peaks centered in the 105.6 to 118.5 ppm range were observed, and they corresponded to the carbon atoms of  $-\text{CF}_2\text{CF}_2\text{CF}_2\text{CF}_2\text{CF}_3$ , respectively, and the peaks at 124.9 and 128.2 ppm were attributed to the carbons of the  $=\text{CF}-$  and  $=\text{CFH}$  groups, respectively.<sup>6</sup>

Similarly, according to the MS data (Figure S2), the product with a retention time of 4.78 min showed fragments with  $m/z$  of 51.32 ( $\text{CF}_2$ ), 68.81 ( $\text{CF}_3$ ), 130.97 ( $\text{CF}_2\text{CF}=\text{CF}_2$ ), 181.21 ( $(\text{CF}_2)_2\text{CF}=\text{CF}_2$ ), 230.90 ( $(\text{CF}_2)_3\text{CF}=\text{CF}_2$ ) and 331.01 ( $\text{CF}_3(\text{CF}_2)_4\text{CF}=\text{CF}$ ), which could be assigned to perfluorohept-1-ene ( $\text{CF}_3(\text{CF}_2)_4\text{CF}=\text{CF}_2$ ). The other product, which had a retention time of 5.04 min, showed fragments with  $m/z$  of 51.37 ( $\text{CF}_2$ ), 68.80 ( $\text{CF}_3$ ), 101.01 ( $\text{CF}_2\text{CF}_2$ ), 131.03 ( $\text{CF}_2\text{CF}=\text{CF}_2$ ), 231.07 ( $(\text{CF}_2)_3\text{CF}=\text{CF}_2$ ), and 250.21 ( $\text{CF}_3(\text{CF}_2)_2\text{CF}=\text{CF}_2$ ), which could be assigned to 1H-perfluoropent-1-ene ( $\text{CF}_3(\text{CF}_2)_2\text{CF}=\text{CFH}$ ).

Based on the MC conversion of PFOA and the yield of the product, the selectivity of 1H-1-PFHp was calculated from the following equation (eq. S6):

$$\text{Selectivity \%} = \frac{\text{yield of products}}{\text{conversion ratio of PFOA}} \times 100\% \quad \text{S6}$$

The calculated selectivity is shown in Figure S3. A good correlation was obtained between the yield of 1H-1-PFHp and the conversion of PFOA within 2.5 h of ball milling, and the selectivity of the conversion of PFOA into 1H-1-PFHp was consistently up to 89%.

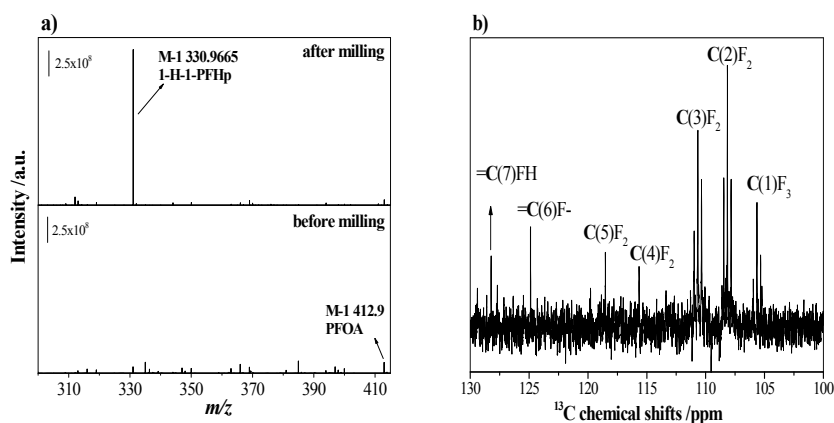

**Figure S1.** FT-MS spectra (a) and  $^{13}\text{C}$  NMR spectrum (b) of the samples extracted during MC conversion of PFOA within 2.5 h; acetone was using as the extraction agent. Prior to NMR measurements, 200  $\mu\text{L}$  extracts was diluted with 500  $\mu\text{L}$  acetone- $\text{D}_6$ .

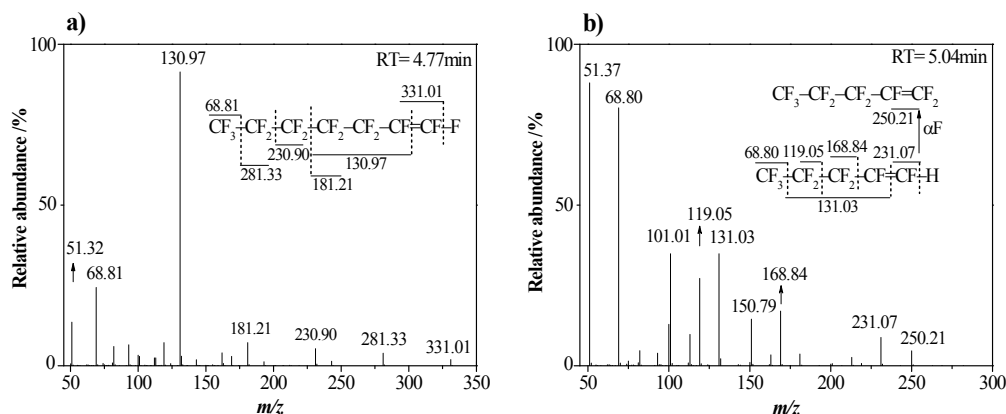

**Figure S2.** GC/MS profiles of the minority products (a. perfluorohept-1-ene and b. 1H-perfluoropent-1-ene) after 2.5 h of ball milling of PFOA with alumina. Acetone was used as the extraction agent.

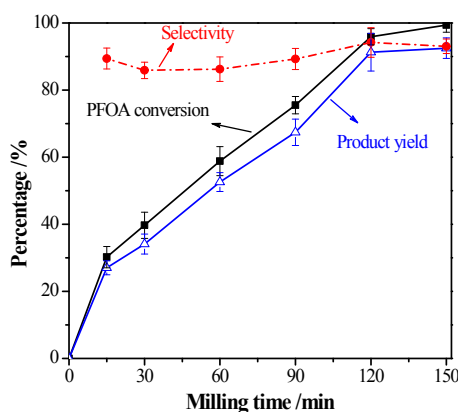

**Figure S3.** MC conversion of PFOA into 1H-1-PFHp by milling PFOA with alumina.

### Possibilities of scale-up on the MC conversion of PFOA into 1H-1-PFHp

The scale-up experiments have been conducted at a higher PFOA/alumina weight ratio ( $R_w$ ), a larger filling ratio and a lower ball-to-powders weight ratio ( $m_b/m_p$ ), and the results were shown in Table S5 and Figure S4. At a given  $R_w$  value of 16.3% and a filling ratio of milling pot ( $R_f$ ) at 35%, as the  $m_b/m_p$  value was increased from 10 to 100, both the degradation of PFOA and the generation of 1H-1-PFHp was significantly improved in an  $m_b/m_p$  range of 10~50, and then reached a platform when the  $m_b/m_p$  value was beyond 50. Thus, the  $m_b/m_p$  was recommended as 50 in this work unless specified elsewhere. At an  $m_b/m_p$  of 50, an increasing in the  $R_w$  value from 8.2% to 16.3% did not influence the 2-h conversion of PFOA, but slightly increased both the yield and selectivity of 1H-1-PFHp, due to that at a lower  $R_w$  value, excessive alumina increased the defluorination ratio. When the  $R_w$  value was further increased from 16.3% to 40.5%, both the degradation of PFOA and the selectivity of 1H-1-PFHp was gradually decreased, but all the added PFOA could be converted with a 1H-1-PFHp selectivity of >80% if prolonging the MC treatment time to 4.5 h. Moreover, when the  $R_f$  value was increased from 20% to 60% at a fixed  $m_b/m_p$  of 50 and  $R_w$  of 16.3%, the MC treatment of PFOA (1.18 g) with alumina (7.22 g) (i.e., 60% of filling ratio) also gave the high yield of 1H-1-PFHp (87.6%, GC yield) within 3 h.

**Table S5.** Conversion (Conv.) of PFOA into  $F^-$  and 1H-1-PFHp in the MC/alumina system at a  $R_f$  of 35% after 2 h treatment.

| $R_w$ (%) <sup>[a]</sup> | $m_b/m_p$ | PFOA Conv. (%) | $F^-$ |       | 1H-1-PFHp |       |
|--------------------------|-----------|----------------|-------|-------|-----------|-------|
|                          |           |                | Y (%) | S (%) | Y (%)     | S (%) |
| 16.3                     | 10        | 25.3           | 4.5   | 17.8  | 8.9       | 35.2  |
|                          | 25        | 68.7           | 9.7   | 14.1  | 36.9      | 53.7  |
|                          | 50        | 95.9           | 14.1  | 14.7  | 91.3      | 95.2  |
|                          | 100       | 98.6           | 15.6  | 15.8  | 92.8      | 94.1  |
| 8.2                      | 50        | 97.8           | 17.8  | 18.2  | 82.2      | 84    |
| 11.7                     |           | 98.1           | 16.1  | 16.4  | 88.4      | 90.1  |
| 20.3                     |           | 85.9           | 11.7  | 13.6  | 75        | 87.3  |
| 24.3                     |           | 63.2           | 8.1   | 12.8  | 50.7      | 80.3  |
| 40.5                     |           | 10.3           | 0.6   | 5.8   | 4.0       | 38.8  |

<sup>[a]</sup>: weight ratio of PFOA/ $Al_2O_3$ .

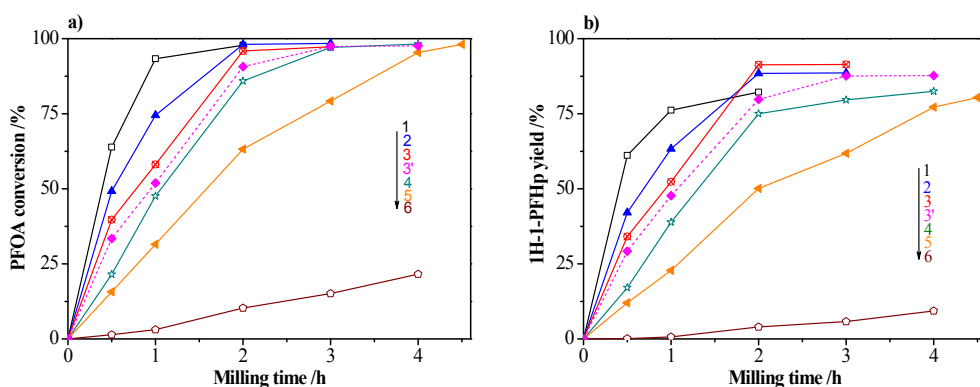

**Figure S4.** Conversion of PFOA into 1H-1-PFHp in MC/alumina systems at an  $m_b/m_p$  of 50 but at different PFOA/ $Al_2O_3$  weight ratios of 8.2 (1), 11.7 (2), 16.3 (3, 3'), 20.3 (4), 24.3 (5), and 40.5 (6). The filling ratio of milling pot was 35%, except for the case of (3') in which it was 60%.

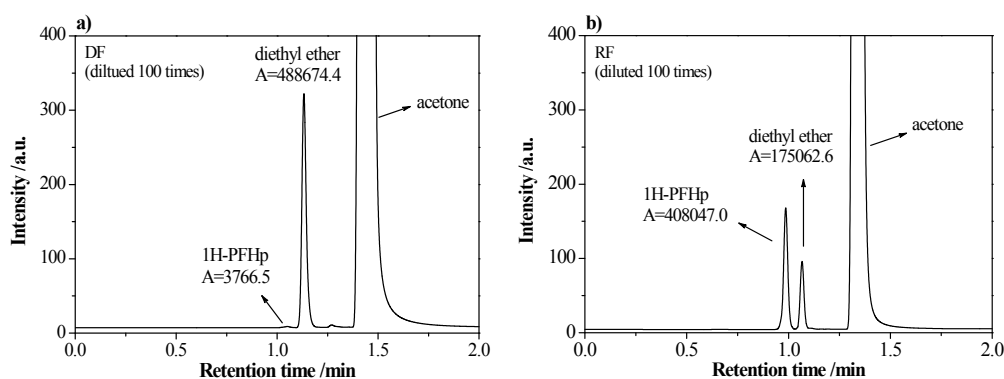

**Figure S5.** GC profiles of recovered distilled fraction (DF) and residual fraction (RF) during the isolation of 1H-PFHp. Prior to GC analysis, both DF and RF were diluted with acetone by 100 times. According to eqs. S2 and S4, the  $f_m$  of 1H-PFHp to diethyl ether was calculated to be 3.6, which was employed to access the relative distribution of components in both distillates and residual fraction. It was observed that only 2.7% of 1H-PFHp was distilled off in the DF, and the isolated 1H-1-PFHp in RF possessed a purity >85%.

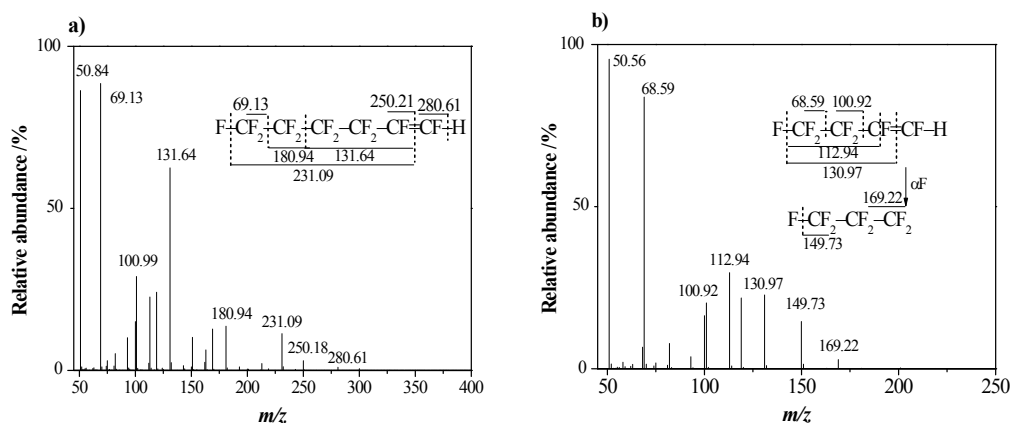

**Figure S6.** GC/MS profiles of majority products after 2 h of ball milling of  $C_6F_{13}COOH$  (a) and  $C_4F_9COOH$  (b) with alumina. Acetone was used as the extraction agent.

### DR-FTIR spectra of Al-F bonds

$Al_2O_3$  and the mixture of PFOA and  $Al_2O_3$  before and after the 5-min milling treatment at rotation speeds of 50 and 100 rpm were characterized by DR-FTIR spectroscopy, respectively. Figure S7 also showed DR-FTIR spectra of the  $Al_2O_3$ -NaF mixture before and after 5-min milling as references. As the rotation speed was increased to 100 rpm, the milled  $Al_2O_3$ -PFOA mixture at 100 rpm exhibited a new peak at  $1021\text{ cm}^{-1}$ . The same peak also appeared at the same wavenumber in the spectrum of the  $Al_2O_3$ -NaF mixture after the 5-min milling treatment at a rotation speed of 50 rpm, but not found in the case of  $Al_2O_3$  alone under the same milling conditions. Thus, the new peak at  $1021\text{ cm}^{-1}$  in the DR-FTIR profile of milled  $Al_2O_3$ -PFOA mixture could be assigned to the formation of Al-F between Lewis acid sites and the released fluoride ions.

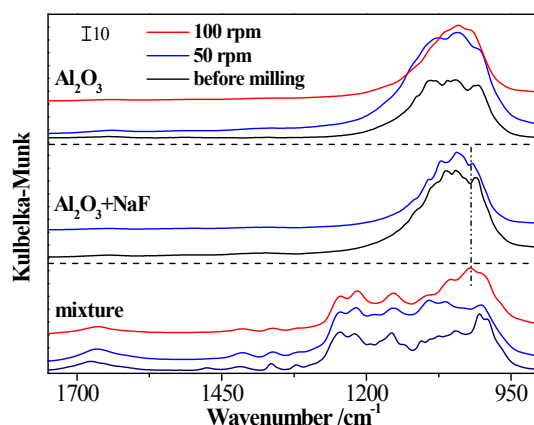

**Figure S7.** DR-FTIR spectra of  $\text{Al}_2\text{O}_3$  and the mixtures of PFOA- $\text{Al}_2\text{O}_3$  and  $\text{Al}_2\text{O}_3$ -NaF before (black line) and after the 5-min milling treatment at rotation speeds of 50 (blue line) and 100 (red line) rpm.

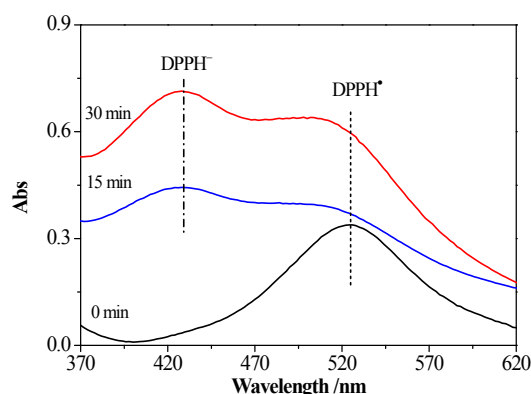

**Figure S8.** UV-Vis absorption changes of extraction solution with dimethyl sulfoxide (DMSO) for the test on co-milled  $\text{DPPH}^\bullet$  with  $\text{Al}_2\text{O}_3$  at different milling time. Before ball milling, the extracted  $\text{DPPH}^\bullet$  solution showed a characteristic absorption peak at 525 nm. After ball milling, it was observed a new peak centered at 425 nm, which could be attributed to anionic form  $\text{DPPH}^-$ . Thus, the ball milling process can generate free electrons on mechanically activated alumina surfaces. This can be explained by that lattice oxide of metal oxides can volatilize as molecular oxygen, and oxygen vacancies were simultaneously formed in the lattice as well as releasing two electrons during high energy milling.

### DR-FTIR spectra of thermal treatment of Alumina

DR-FTIR spectra of the heated alumina after 30-min heat treatments at 25 and 150 °C in the absence of PFOA are also provided as references. As shown in Figure S9, only the loss of the characteristic absorption of the surface OH groups ( $3200\sim 3700\text{ cm}^{-1}$ ) on the alumina was observed in the profile of the heated alumina in the absence of PFOA.

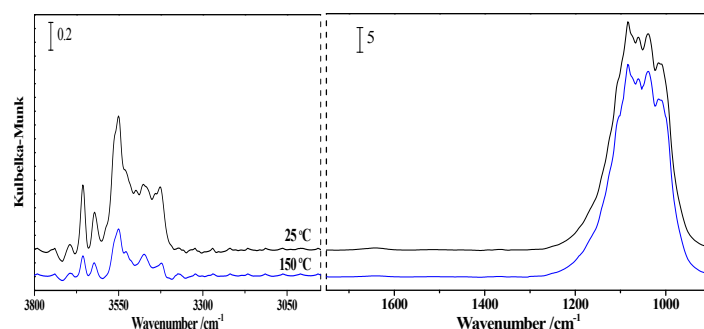

**Figure S9.** DR-FTIR spectra of  $\text{Al}_2\text{O}_3$  after 30-min thermal treatments at 25 and 150 °C.

### References

1. J.-Y. d. S. Laumer, E. Cicchetti, P. Merle, J. Egger and A. Chaintreau, *Anal. Chem.*, 2010, **82**, 6457.
2. E. Tissot, S. Rochat, C. Debonneville and A. Chaintreau, *Flavour Frag. J.*, 2012, **27**, 290.
3. J. D. LaZerte, L. J. Hals, T. S. Reid and G. H. Smith, *J. Am. Chem. Soc.*, 1953, **75** 4525.



4. S. Pawsey and L. Reven, *Langmuir*, 2006, **22**, 1055.
5. O. Paleta, V. Církva and J. Kvíčala, *J. Fluorine Chem.*, 1996, **80**, 125.
6. Z. Ge, X. Zhang, J. Dai, W. Li and Y. Luo, *Eur. Polym. J.*, 2009, **45**, 530.
